# Supplementary material
Source: ML conference proceedings conference paper supplement (https://proceedings.neurips.cc/paper_files/paper/2008/hash/f5f8590cd58a54e94377e6ae2eded4d9-Abstract.html)
Supplement: Supplementary file [file f5f8590cd58a54e94377e6ae2eded4d9-Supplemental.zip]

## Appendix

A common sampling technique often used in this setting is the Metropolis-Hastings algorithm, which is a Markov chain Monte Carlo (MCMC) method. The M-H acceptance probability for moving from state  $x$  to state  $x'$  is shown below, where each *state* is a DBN.

$$\alpha(x, x') = \min \left\{ 1, \frac{p(D|x')}{p(D|x)} \times \frac{p(x' \rightarrow x)}{p(x \rightarrow x')} \right\} = \min \left\{ 1, \underbrace{\frac{p(D|x')}{p(D|x)}}_{\text{likelihood ratio}} \times \underbrace{\frac{p(m')p(x|x', m')}{p(m)p(x'|x, m)}}_{\text{proposal ratio}} \right\}$$

where  $m$  is the move type that allows for a transition from state  $x$  to  $x'$  and  $m'$  is the reverse move type for a transition from state  $x'$  back to state  $x$ . The proposal ratio can be split into two terms: one is the ratio of the proposal probabilities for move types and the other is the ratio of selecting a particular state given the current state and the move type. The choice of scoring metric determines the likelihoods, and often  $p(m')$  and  $p(m)$  are chosen *a priori* to be simple to calculate or to actually cancel out.

| Move type $M$                                       | Proposal probability | $\frac{p(M')}{p(M)}$    | $\frac{p(x x', M')}{p(x' x, M')}$                                                                                         |                                                                                                                                                                                |
|-----------------------------------------------------|----------------------|-------------------------|---------------------------------------------------------------------------------------------------------------------------|--------------------------------------------------------------------------------------------------------------------------------------------------------------------------------|
| $(M_1)$ add edge to $G_1$                           | $P_a$                | $\frac{P_d}{P_a}$       | $\frac{(E_1+1)^{-1}}{(np_{max}-E_1)^{-1}} = \frac{np_{max}-E_1}{E_1+1}$                                                   | <div style="display: flex; align-items: center;"> <div style="margin-right: 5px;">}</div> <div style="writing-mode: vertical-rl; transform: rotate(180deg);">KNKT</div> </div> |
| $(M_2)$ delete edge from $G_1$                      | $P_d$                | $\frac{P_a}{P_d}$       | $\frac{(np_{max}-E_1+1)^{-1}}{E_1^{-1}} = \frac{E_1}{np_{max}-E_1+1}$                                                     |                                                                                                                                                                                |
| $(M_3)$ add edge to $\Delta g_i$                    | $P_{ae}$             | $\frac{P_{de}}{P_{ae}}$ | $\frac{m^{-1}(S_i+1)^{-1}}{m^{-1}(S_{max}-S_i)^{-1}} = \frac{S_{max}-S_i}{S_i+1}$                                         |                                                                                                                                                                                |
| $(M_4)$ delete edge from $\Delta g_i$               | $P_{de}$             | $\frac{P_{ae}}{P_{de}}$ | $\frac{m^{-1}(S_{max}-S_i+1)^{-1}}{m^{-1}S_i^{-1}} = \frac{S_i}{S_{max}-S_i+1}$                                           |                                                                                                                                                                                |
| $(M_5)$ move edge from $\Delta g_i$ to $\Delta g_j$ | $P_{me}$             | 1                       | $\frac{(m-1)^{-1}(\sum_i S_i)^{-1}}{(m-1)^{-1}(\sum_i S_i)^{-1}} = 1$                                                     |                                                                                                                                                                                |
| $(M_6)$ locally shift $t_i$                         | $P_{st}$             | 1                       | $\frac{(2d+1)^{-1}}{(2d+1)^{-1}} = 1$                                                                                     |                                                                                                                                                                                |
| $(M_7)$ merge $\Delta g_i$ and $\Delta g_{i+1}$     | $P_m$                | $\frac{P_s}{P_m}$       | $\frac{(m-1)^{-1}2^{(S_i+S_{i+1})^{-1}}(S_i+S_{i+1})^{-1}}{(m-1)^{-1}} = \frac{2}{(S_i+S_{i+1})\binom{S_i+S_{i+1}}{S_i}}$ | <div style="display: flex; align-items: center;"> <div style="margin-right: 5px;">}</div> <div style="writing-mode: vertical-rl; transform: rotate(180deg);">UNUT</div> </div> |
| $(M_8)$ split $\Delta g_i$                          | $P_s$                | $\frac{P_m}{P_s}$       | $\frac{(m-1)^{-1}}{(m-1)^{-1}(S_i/2)^{-1}\binom{S_i}{x}} = (S_i/2)\binom{S_i}{x}$                                         |                                                                                                                                                                                |
| $(M_9)$ create new $\Delta g_i$                     | $P_{ag}$             | $\frac{P_{dg}}{P_{ag}}$ | $\frac{(m+1)^{-1}}{(N-m)^{-1}n^{-2}} = \frac{(N-m)n^2}{m+1}$                                                              |                                                                                                                                                                                |
| $(M_{10})$ delete $\Delta g_i$                      | $P_{dg}$             | $\frac{P_{ag}}{P_{dg}}$ | $\frac{(N-m-1)^{-1}n^{-2}}{m^{-1}} = \frac{m}{(N-m-1)n^2}$                                                                |                                                                                                                                                                                |

Table 1:  $E_1$  is the total number of edges in  $G_1$ ,  $S_{max}$  is the maximum number of transitions allowed in a single transition time,  $p_{max}$  is the maximum parent set size, and  $S_i$  is the number of edge changes in the set  $\Delta g_i$ . The proposal ratio is the product of the last two columns. The KNKT setting uses moves  $(M_1) - (M_5)$ , KNUT uses moves  $(M_1) - (M_6)$ , and UNUT uses moves  $(M_1) - (M_{10})$ , in each case with the proposal probabilities appropriately normalized to add to 1.

All of the F1-measures for the nsDBNs learned under the UNUT setting are shown in Table 2 below.

**A**

| $\lambda_s$ |        |        |        |               |    |
|-------------|--------|--------|--------|---------------|----|
| 1           | 2      | 3      | 4      | 5             |    |
| 0.4341      | 0.9423 | 0.9469 | 0.9738 | <b>0.9912</b> | 1  |
| 0.6760      | 0.9562 | 0.9553 | 0.9906 | 0.9909        | 2  |
| 0.9206      | 0.9553 | 0.9729 | 0.9731 | 0.9905        | 5  |
| 0.9264      | 0.9550 | 0.9657 | 0.9829 | 0.9791        | 10 |
| 0.8804      | 0.8806 | 0.9042 | 0.8922 | 0.8807        | 50 |

**B**

| $\lambda_s$   |        |        |   |  |
|---------------|--------|--------|---|--|
| 1             | 3      | 5      |   |  |
| 0.9489        | 0.9510 | 0.9468 | 1 |  |
| 0.9377        | 0.9521 | 0.9356 | 2 |  |
| <b>0.9531</b> | 0.9459 | 0.9398 | 5 |  |

Table 2: F1-measure for different values of  $\lambda_s$  and  $\lambda_m$  under the UNUT setting. F1-measures over 0.9 are shaded in light gray and the best score is shown in bold. **A**: F1-measures for the nine variable dataset defined by the nsDBN in Figure 1A. **B**: F1-measures for the large 100 variable dataset.
